# Supplementary material
Source: PubMed Central journal article supplement (PMC3931743)

**a**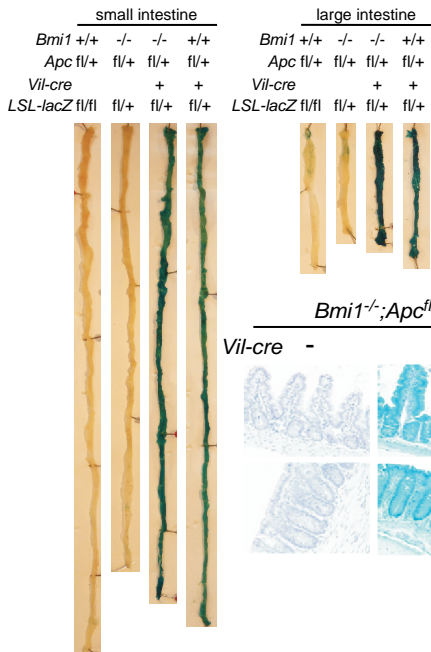**b**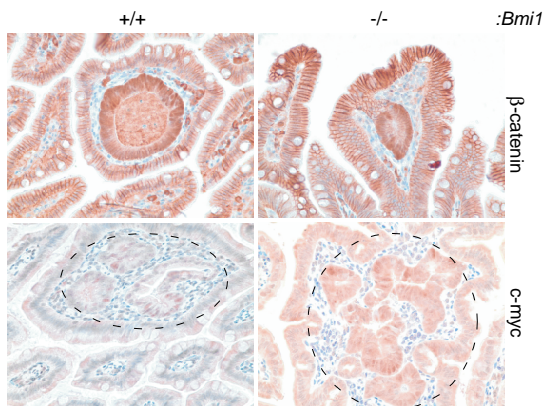

Supplement: NIHMS540449-supplement-Suppl_Fig_1.pdf [file NIHMS540449-supplement-Suppl_Fig_1.pdf]

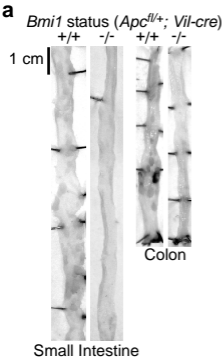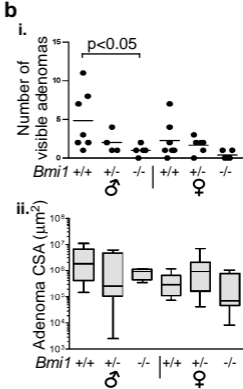

Supplement: NIHMS540449-supplement-Suppl_Fig_2.pdf [file NIHMS540449-supplement-Suppl_Fig_2.pdf]

**a**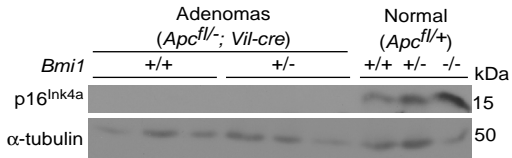**b**

+/+      *Bmi1* (*Apc<sup>fl/+</sup>; Vil-cre*)      -/-

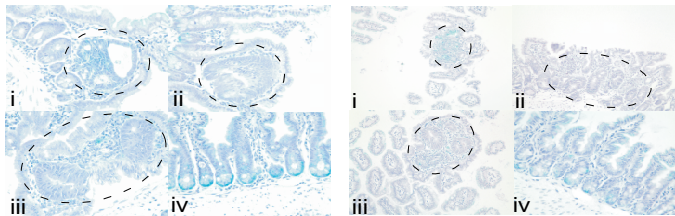

Supplement: NIHMS540449-supplement-Suppl_Fig_3.pdf [file NIHMS540449-supplement-Suppl_Fig_3.pdf]

**a**

i.

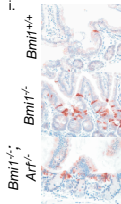

ii.

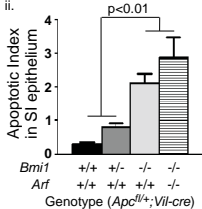**b**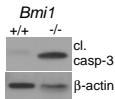**c**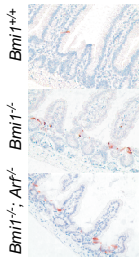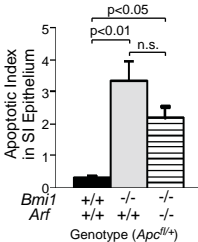

Supplement: NIHMS540449-supplement-Suppl_Fig_4.pdf [file NIHMS540449-supplement-Suppl_Fig_4.pdf]

## Sequencing of *Tp53* in SI adenomas

| Exon \ Genotype | 5  | 6  | 7  | 8 | 9 |
|-----------------|----|----|----|---|---|
| -/-             | 12 | 13 | 9  | 4 | 4 |
| +/+             | 5  | 8  | 11 | 3 | 1 |

SI adenoma

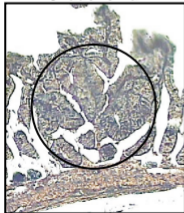

captured/trimmed

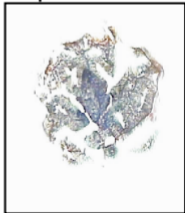

Supplement: NIHMS540449-supplement-Suppl_Fig_5.pdf [file NIHMS540449-supplement-Suppl_Fig_5.pdf]

**a**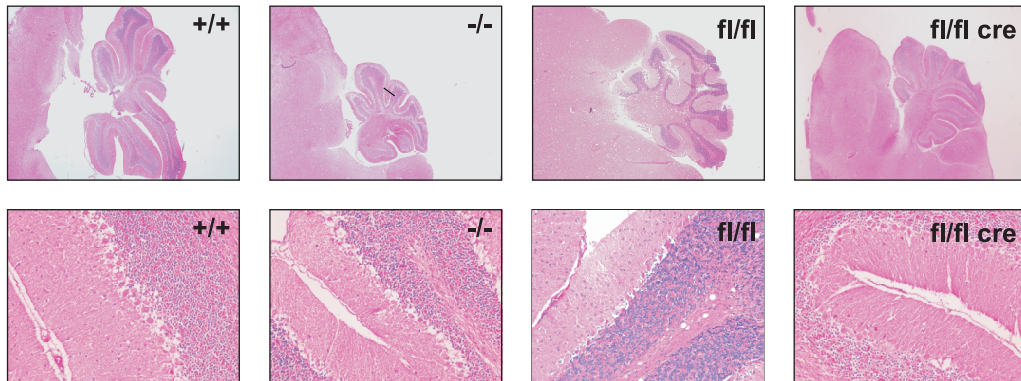**b**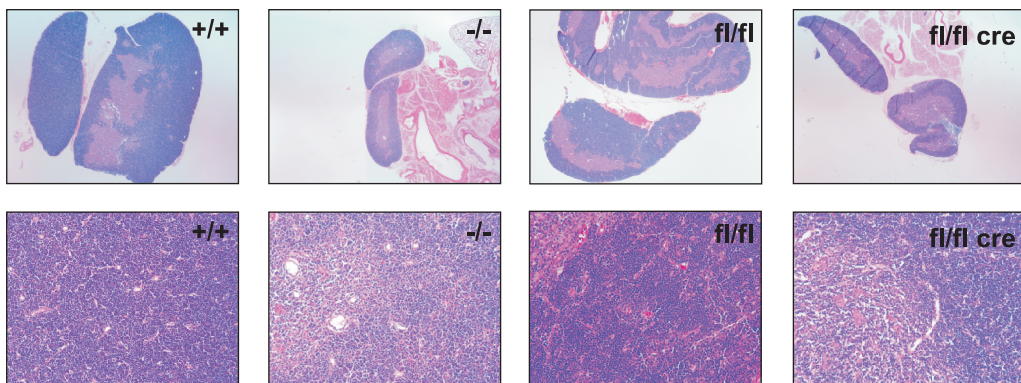**c**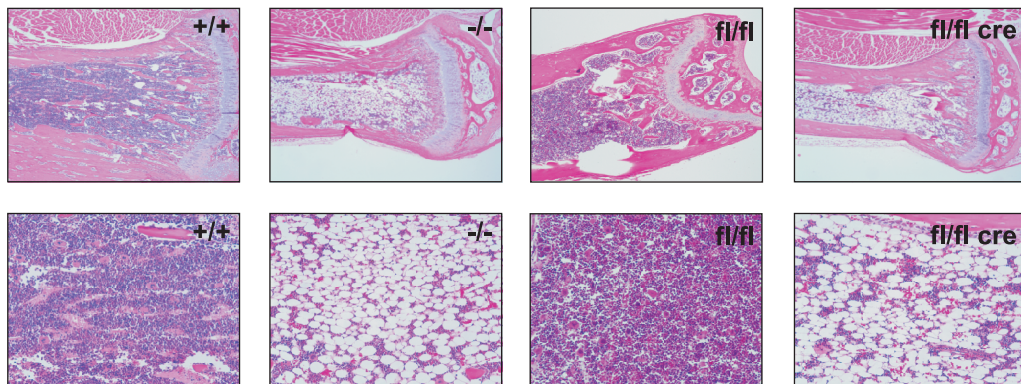

Supplement: NIHMS540449-supplement-Suppl_Fig_6.pdf [file NIHMS540449-supplement-Suppl_Fig_6.pdf]
